# Supplementary material for: Two hydrazone copper(ii) complexes: synthesis, crystal structure, cytotoxicity, and action mechanism
Source: Royal Society of Chemistry journal article supplement (doi:10.1039/c6ra03478k), 2016-01-01

## Electronic Supporting Information Materials

Two hydrazone Copper (II) complexes: Synthesis, crystal structure, cytotoxicity, and action mechanism

Kun Hu,<sup>a</sup> Guimei Zhou,<sup>a</sup> Zhong Zhang,<sup>a</sup> Feiyan Li,<sup>a</sup> Jingui Li,<sup>a</sup> and Fupei Liang<sup>\*a,b</sup>

<sup>a</sup>State Key Laboratory Cultivation Base for the Chemistry and Molecular Engineering of Medicinal Resources, School of Chemistry and Pharmacy, Guangxi Normal University, 15 Yucai Road, Guilin 541004, P. R. China., Fax, 086-773-2120958 ; E-mail: fliangoffice@yahoo.com

<sup>b</sup>Guangxi Key Laboratory of Electrochemical and Magnetochemical Functional Materials, College of Chemistry and Bioengineering, Guilin University of Technology, Guilin 541004, China

Fig. S1. IR (KBr) spectra of H-L1.

Fig. S2. HRMS(ESI) spectra of H-L1. Calcd. for  $C_{18}H_{16}N_3O_3$   $[M+H]^+$  322.11917, found 322.11743.

Fig. S3 NMR spectra of H-L1 in DMSO. A)  $^1H$ ; B)  $^{13}C$ .

Fig. S4. IR (KBr) spectra of H-L2.

Fig. S5. HRMS(ESI) spectra of H-L2. Calcd. for  $C_{17}H_{14}N_3O_2$   $[M+H]^+$  292.10860, found 292.10674.

Fig. S6 NMR spectra of H-L1 in DMSO. A)  $^1H$ ; B)  $^{13}C$ .

Fig. S7. IR (KBr) spectra of complex **1**.

Fig. S8. HRMS (ESI) spectra of complex **1**. Calcd. for  $C_{18}H_{14}N_3O_3Cu$   $[M-NO_3]^+$  383.03312, found 383.03246.

Fig. S9. IR (KBr) spectra of complex **2**.

Fig. S10. HR-ESI-MS spectra of complex **2**. HRMS (ESI): Calcd. for  $C_{17}H_{12}N_3O_2Cu$   $[M-NO_3]^+$  353.02255, found 353.02136.

Fig. S11. LC-MS spectra for **1** and **2** ( $2.0 \times 10^{-6}$  M) monitored at 370 nm in TBS buffer (0.1 %) with 0 h and 48 h. Column: Phenyl-Hexyl (150mm $\times$ 5.0  $\mu$ m I.D.). Column temperature: 25  $^\circ$ C. Mobile phase: A) methol, B)  $H_2O$ . Gradient: 70% to 100% in 20 min. Flow rate: 0.3 mL/min. Injection volume: 5. 0  $\mu$ L. Complex **1**:  $[M-NO_3]^+=383.03236$ ; Complex **2**:  $[M-NO_3]^+=353.02133$ ,  $[M-NO_3+CH_3OH]^+=385.04775$ .

Fig. S1

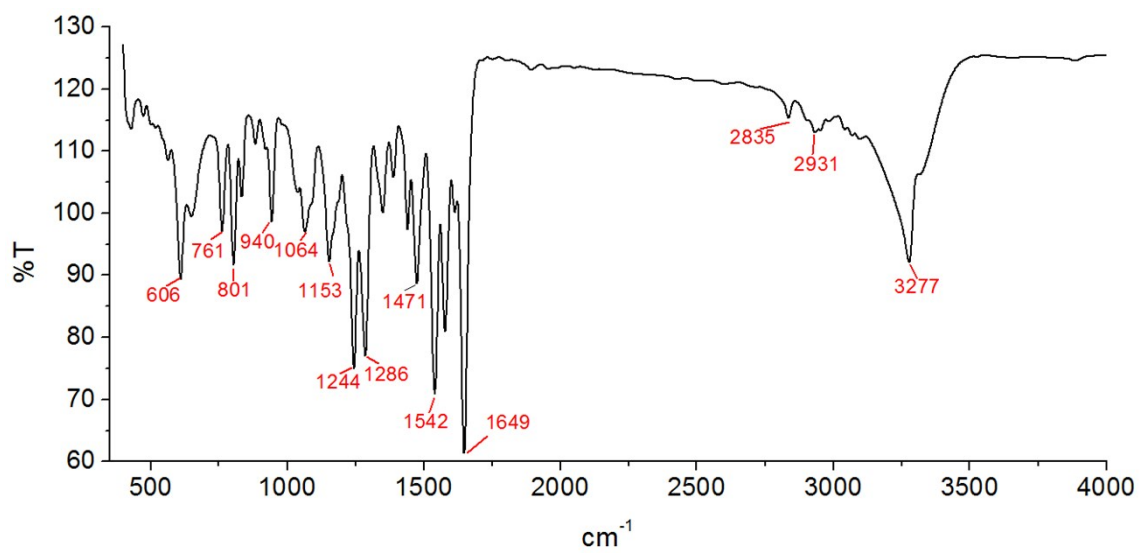

Fig. S2

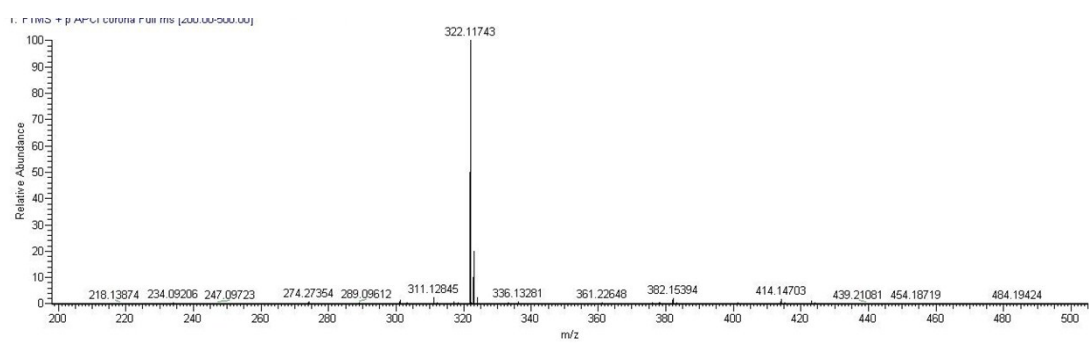

Fig. S3

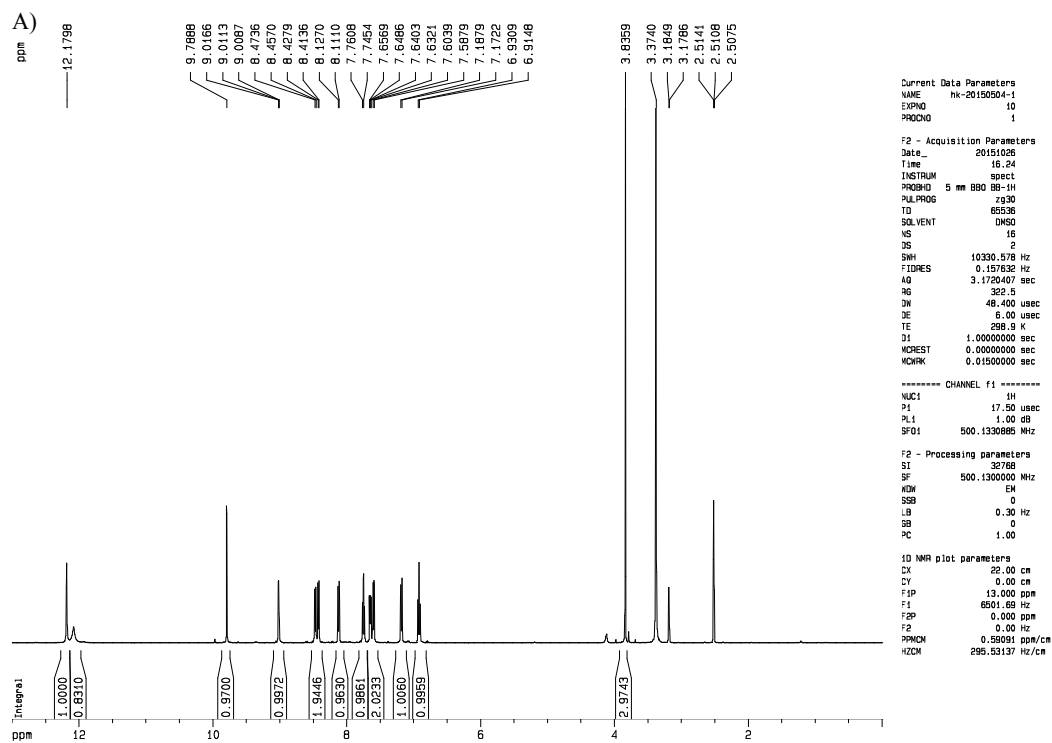

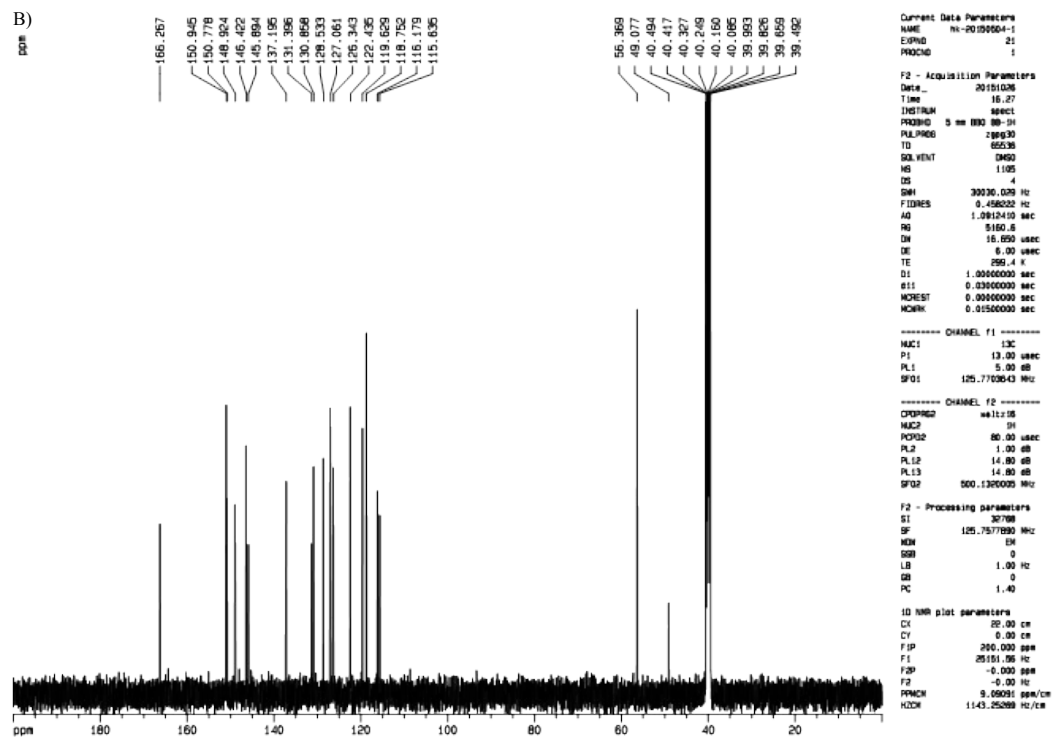

Fig. S4

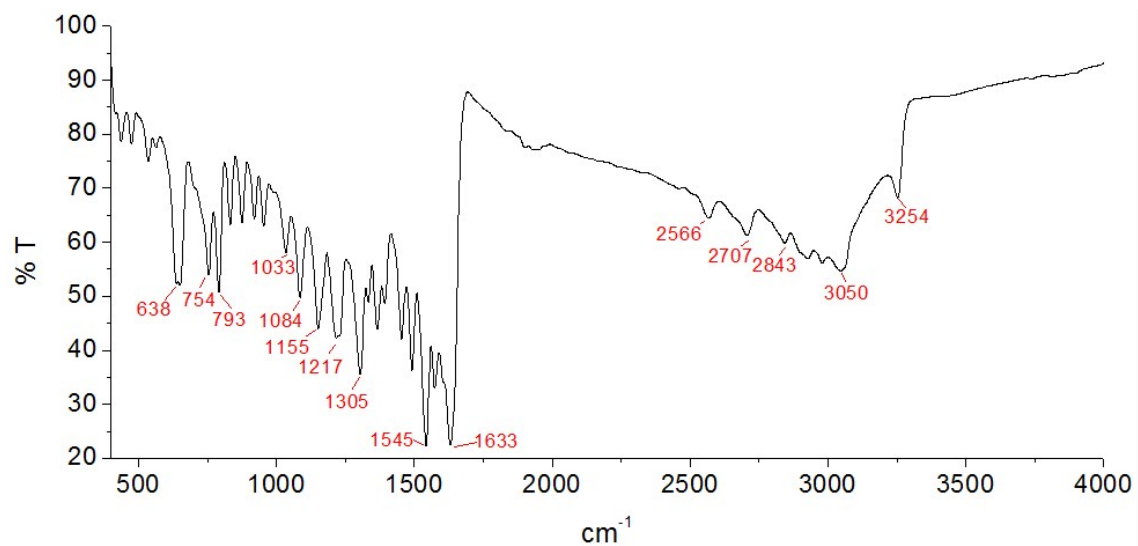

Fig. S5

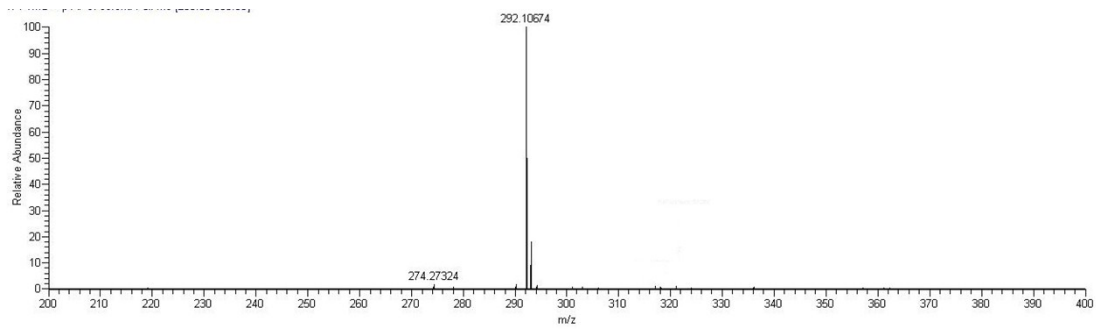

Fig. S6

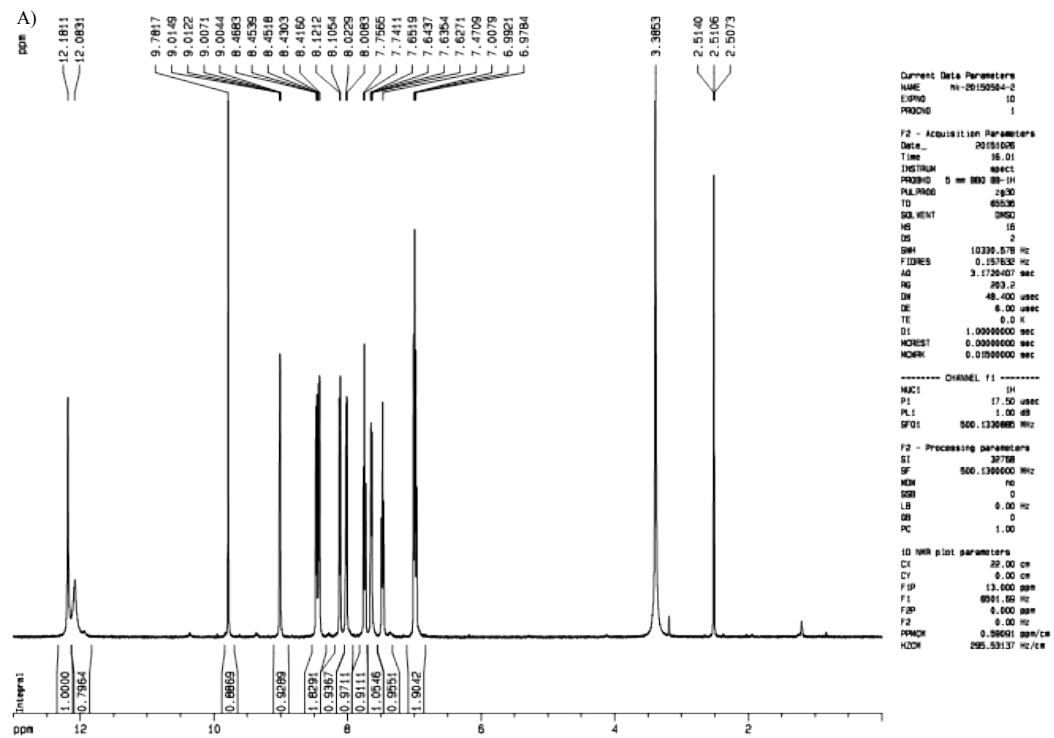

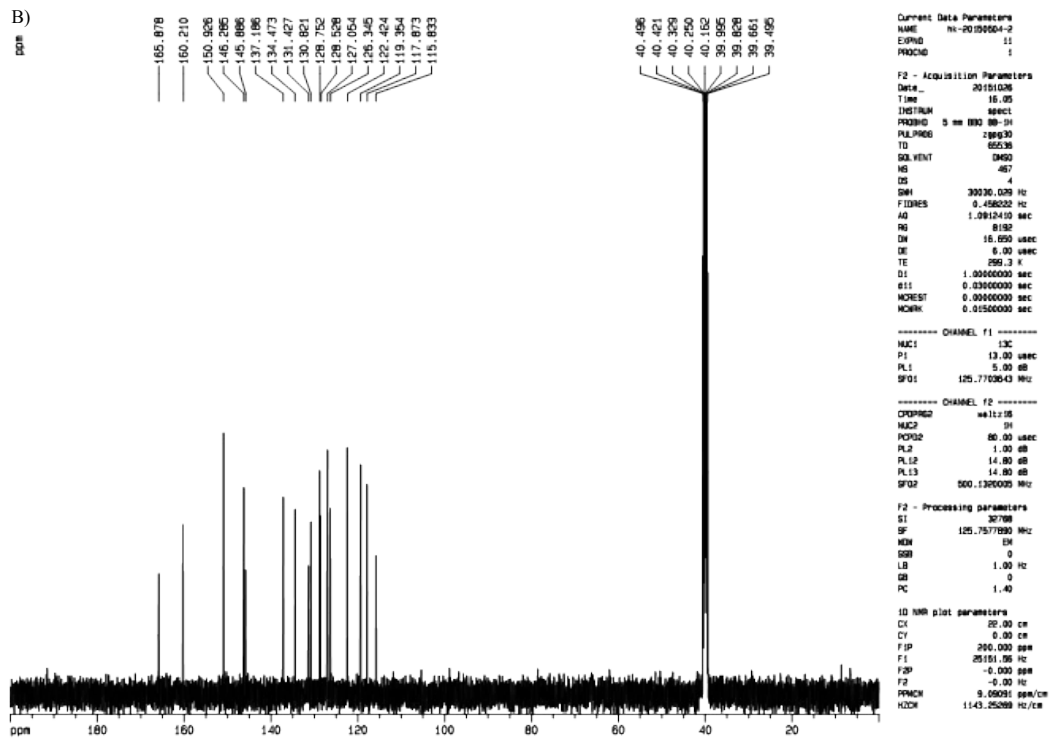

Fig. S7

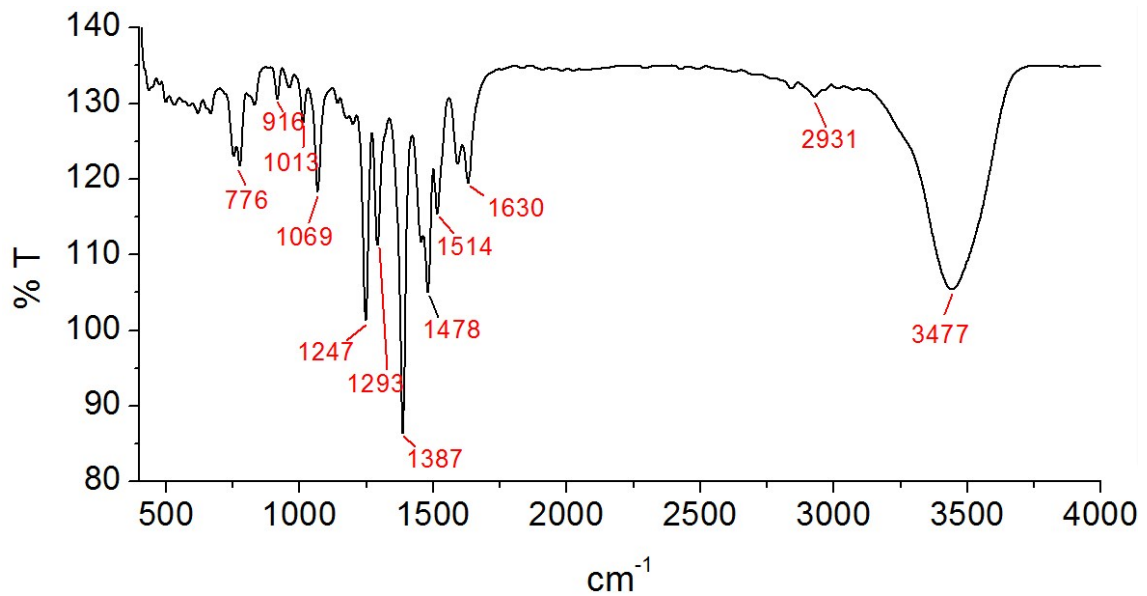

Fig. S8

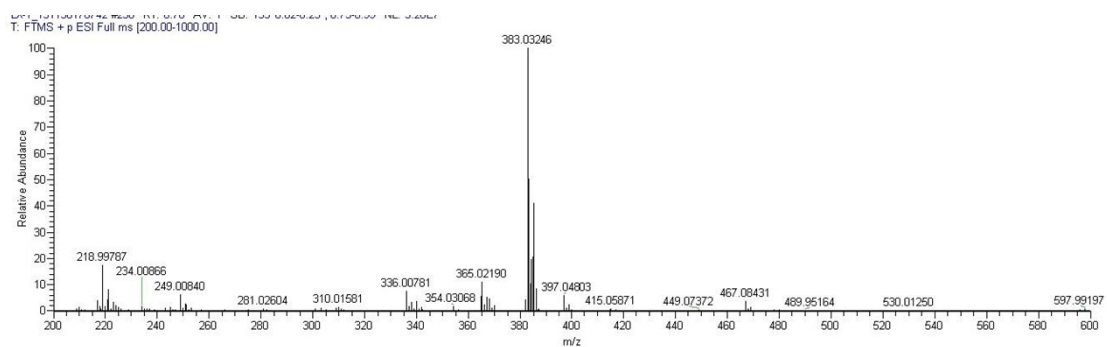

Fig. S9

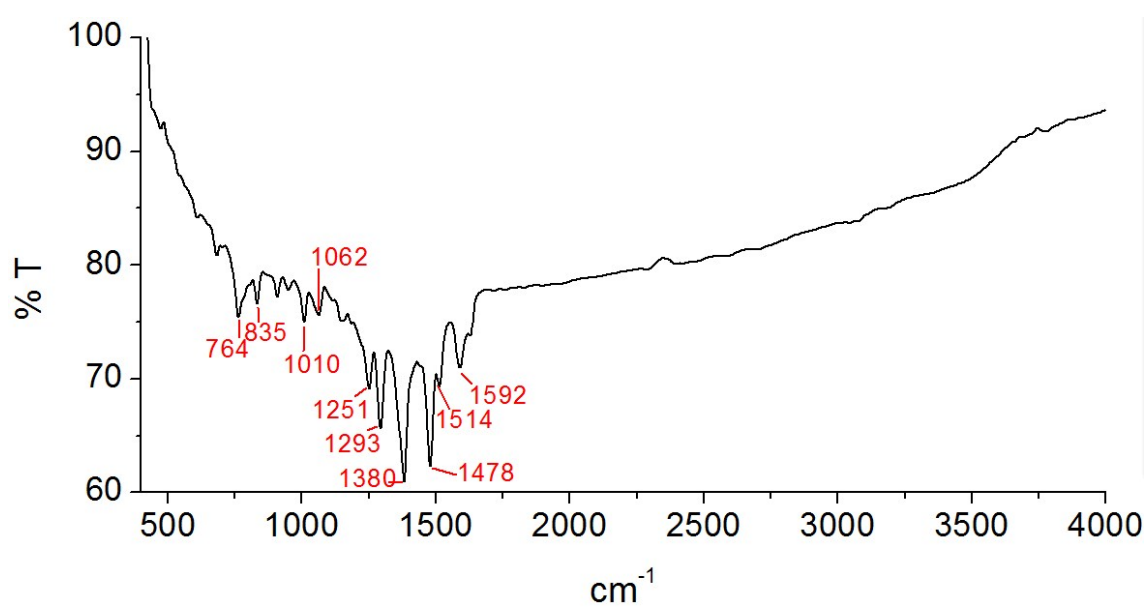



Fig. S10

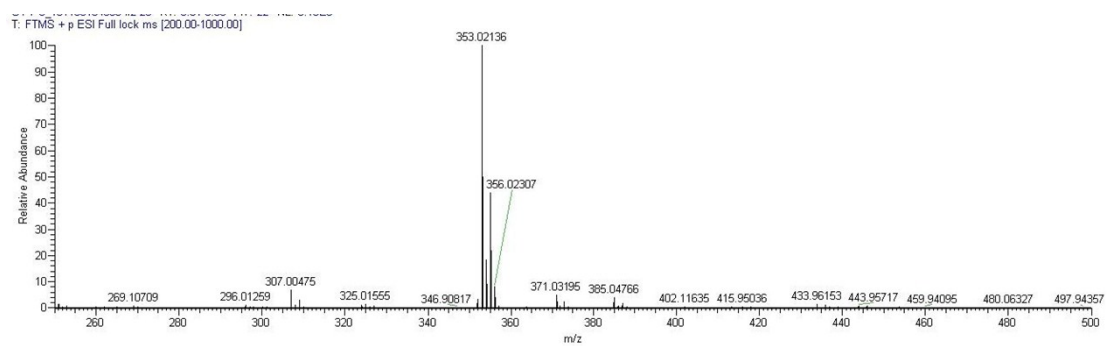

Fig. S11

RT: 0.00 - 19.99

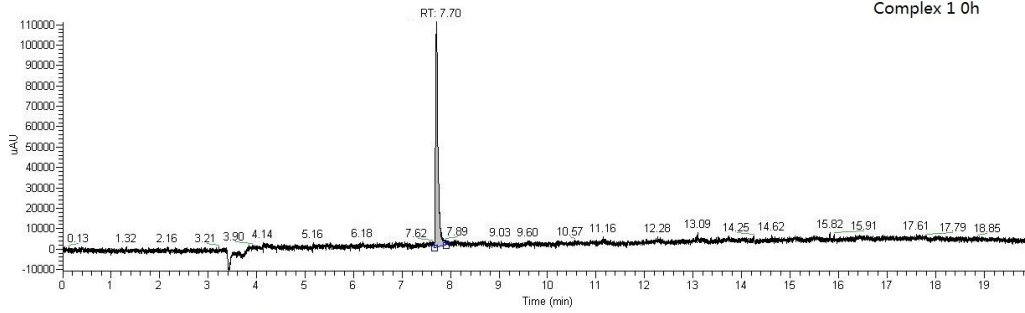

LX-1-21 #1895 RT: 7.92 AV: 1 SB: 1 7.95 NL: 4.60E4  
T: FTMS (1,1) + p ESI Full ms [150.00-1200.00]

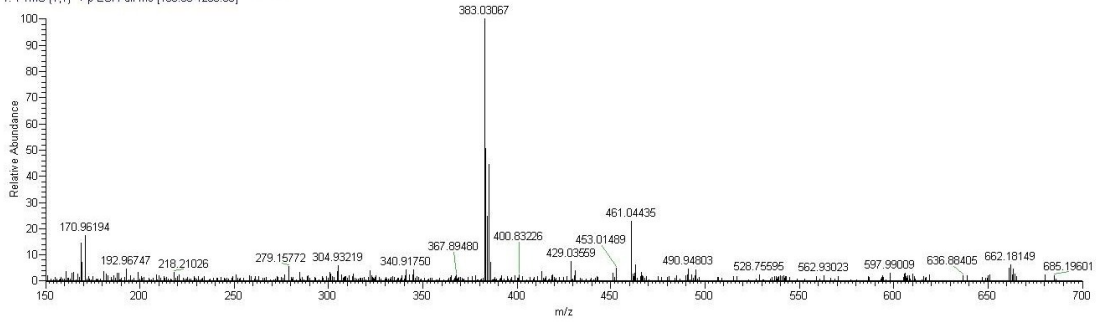

RT: 0.00 - 19.99

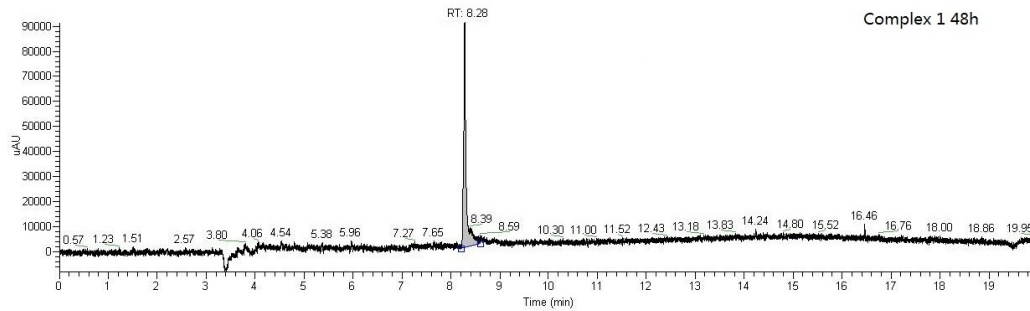

LX-1-24 #2022 RT: 8.45 AV: 1 SB: 1 8.43 NL: 9.18E4  
T: FTMS (1,1) + p ESI Full ms [150.00-1200.00]

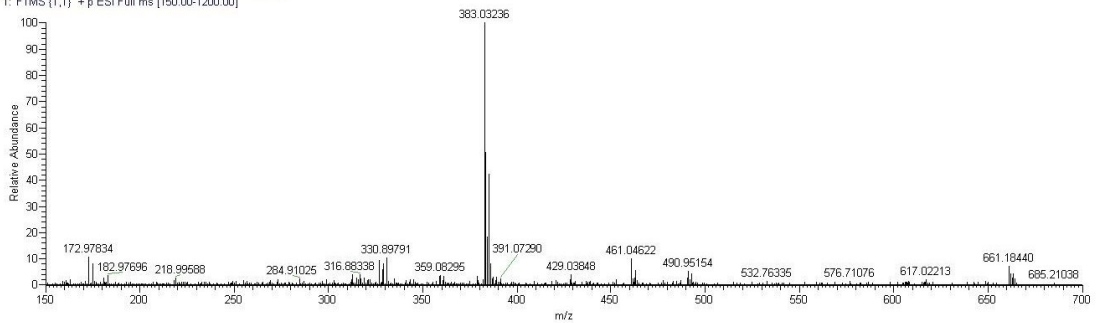

RT: 0.00 - 19.99

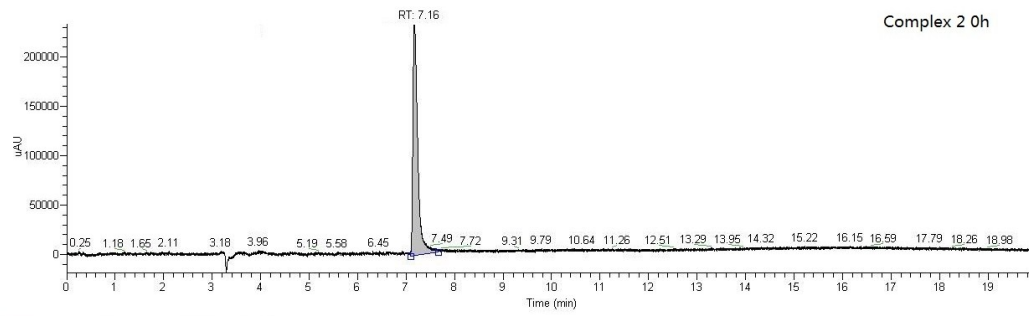

Complex 2 0h

NL:  
2.34E5  
Channel A  
UV SY-14

SY-14 #1795 RT: 7.43 AV: 1 SB: 1.752 NL: 6.47E4  
T: FTMS (1,1) + p ESI Full ms [150.00-1200.00]

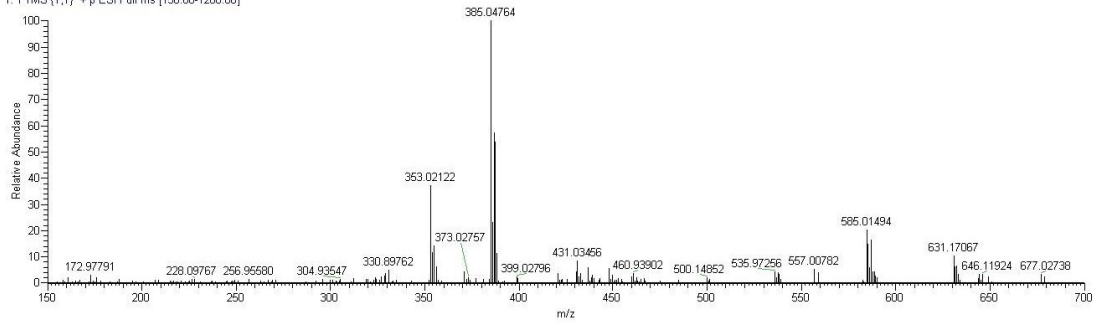

RT: 0.00 - 19.99

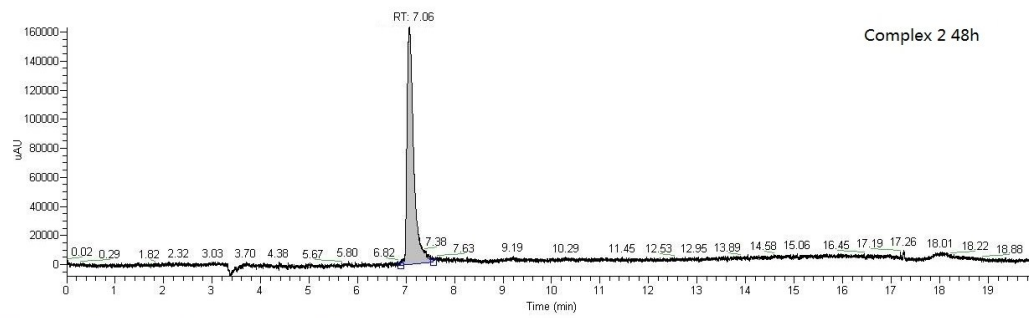

Complex 2 48h

NL:  
1.63E5  
Channel A  
UV  
SY-  
13\_1511081  
70827

SY-13\_151108170827 #1775 RT: 7.38 AV: 1 SB: 1.747 NL: 5.26E4  
T: FTMS (1,1) + p ESI Full ms [150.00-1200.00]

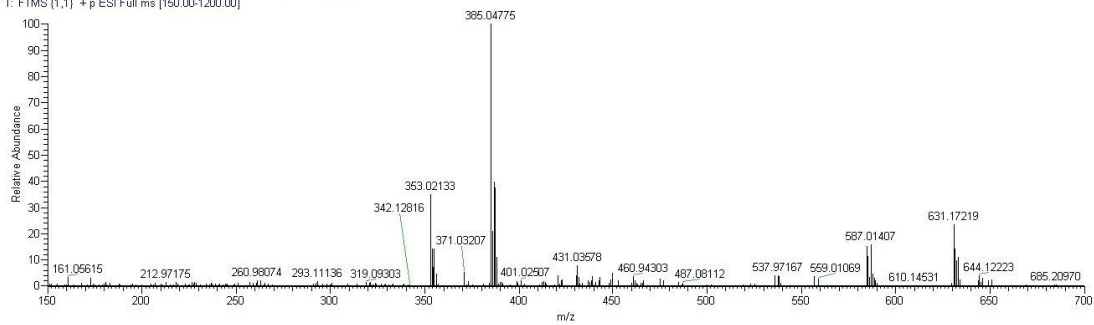

Supplement: c6ra03478k1.pdf [file c6ra03478k1.pdf]
